# Supplementary material
Source: MDPI journal article supplement (https://www.mdpi.com/2036-7422/14/2/17)
Supplement: s1 [file s1]

Archive with 1 entries (1 files):
- gastroent-2458080-supplementary.pdf
